# Supplementary material
Source: Springer Nature journal article supplement (https://www.springermedizin.de/resource/supplementary/12985_2007_314_MOESM2_ESM.pdf/9607502)

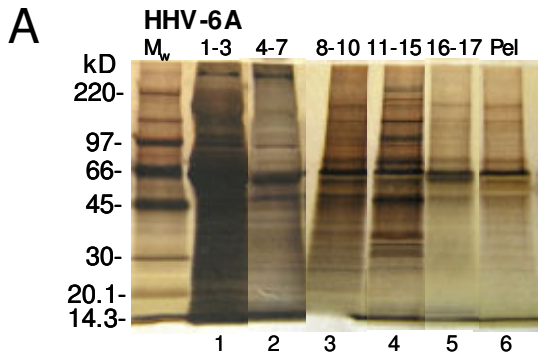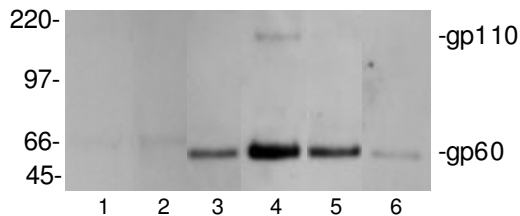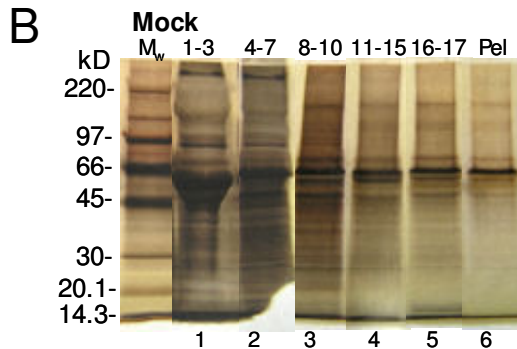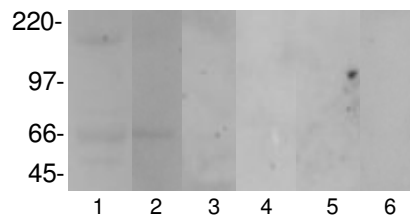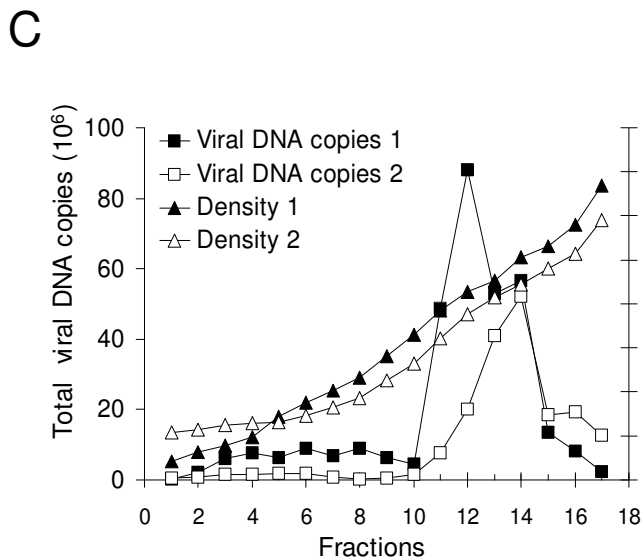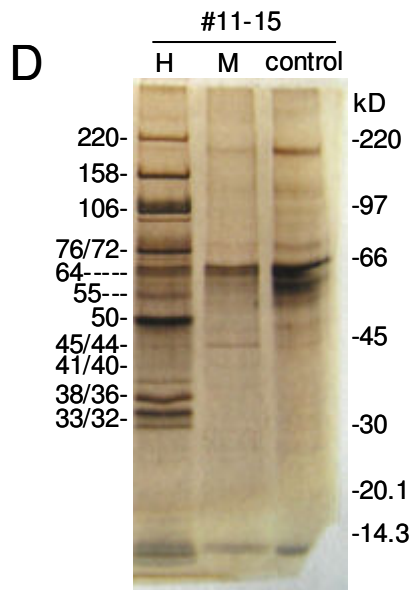

Supplement: MOESM2 [file 9607502]
